## **Learning to synchronize:**

### **How biological agents can couple neural task modules for dealing with the stability-plasticity dilemma**

*short title:* **Learning to synchronize**

*Authors:* Pieter Verbeke<sup>1\*</sup>, Tom Verguts<sup>1</sup>

<sup>1</sup> Department of experimental psychology; Ghent University; B9000

\* *Corresponding author:* Pieter Verbeke

E: [pjverbek.verbeke@ugent.be](mailto:pjverbek.verbeke@ugent.be)

T: +32 9 264 6398

Department of experimental psychology

Ghent University

Henri Dunantlaan 2

Gent B9000

## **Abstract**

We provide a novel computational framework on how biological and artificial agents can learn to flexibly couple and decouple neural task modules for cognitive processing. In this way, they can address the stability-plasticity dilemma. For this purpose, we combine two prominent computational neuroscience principles, namely Binding by Synchrony and Reinforcement Learning. The model learns to synchronize task-relevant modules, while also learning to desynchronize currently task-irrelevant modules. As a result, old (but currently task-irrelevant) information is protected from overwriting (stability) while new information can be learned quickly in currently task-relevant modules (plasticity). We combine learning to synchronize with several classical learning algorithms (backpropagation, Boltzmann machines, Rescorla-Wagner). For each case, we demonstrate that our combined model has significant computational advantages over the original network in both stability and plasticity. Importantly, the resulting models' processing dynamics are also consistent with empirical data and provide empirically testable hypotheses for future MEG/EEG studies.

## **Author summary**

Artificial and biological agents alike face a critical trade-off between being sufficiently adaptive to acquiring novel information (plasticity) and retaining older information (stability); this is known as the stability-plasticity dilemma. Previous work on this dilemma has focused either on computationally efficient solutions for artificial agents or on biologically plausible frameworks for biological agents. What is lacking is a solution that combines computational efficiency with biological plausibility. Therefore, the current work proposes a computational framework on the stability-plasticity dilemma that provides empirically testable hypotheses on both neural and behavioral levels. In this framework, neural task modules can be flexibly coupled and decoupled depending on the task at hand. Testing this framework will allow us to gain more insight in how biological agents deal with the stability-plasticity dilemma.

## Introduction

1  
2 Humans and other primates are remarkably flexible in adapting to constantly changing  
3 environments. Additionally, they excel at integrating information in the long run to detect  
4 regularities in the environment and generalize across contexts. In contrast, artificial neural  
5 networks (ANN), despite being used as models of the primate brain, experience significant  
6 problems in these respects. In ANNs, extracting regularities requires slow, distributed learning,  
7 which does not allow strong flexibility. Moreover, fast sequential learning of different tasks  
8 typically leads to (catastrophic) forgetting of previous information (for an overview see (1)).  
9 Thus, ANNs are typically unable to find a trade-off between being sufficiently adaptive to novel  
10 information (plasticity) and retaining older information (stability), a problem known as the  
11 stability-plasticity dilemma. Additionally, it remains unknown how biological agents deal with  
12 this dilemma.

13         We provide a novel framework on how biological and artificial agents may address this  
14 dilemma. We combine two prominent principles of computational neuroscience, namely Binding  
15 by Synchrony (2–5) and Reinforcement Learning (RL; 6,7). In BBS, neurons are flexibly bound  
16 together by synchronizing them via oscillations. This implements selective gating (e.g., 8) in  
17 which synchronized neurons communicate efficiently, while desynchronized neurons do not.  
18 Thus, BBS allows to flexibly alter communication efficiency on a fast time scale. By using RL  
19 principles, the model can learn autonomously which neurons need to be (de)synchronized.

20         In the modeling framework, BBS binds relevant neural groups, called (neural task)  
21 modules, and unbinds irrelevant modules. This causes both efficient processing and learning in  
22 synchronized modules; and inefficient processing and learning in desynchronized modules. The  
23 resulting model deals with the stability-plasticity dilemma by flexibly switching between task-  
24 relevant modules and by retaining information in task-irrelevant modules. An RL unit (9) uses  
25 reward prediction errors to evaluate whether the model is synchronizing the correct task modules.  
26 We apply our framework to networks that themselves learn via three classic synaptic learning

27 algorithms, namely backpropagation (10), Restricted Boltzmann machines (RBM; 11) and  
28 Rescorla-Wagner (RW; 12,13).

29           The model consists of three units (Figure 1A). The Processing unit contains a network  
30 consisting of a number of task-specific modules. In addition, RL and Control units together form  
31 an hierarchically higher Actor-Critic structure, modeled after basal ganglia/primate prefrontal  
32 cortex (14). The RL unit (modeling ventral striatum/ anterior medial frontal cortex) evaluates  
33 behavior. More specifically, it learns to assign a value to a specific task module (how much reward  
34 it receives by using this module) and compares this value with the externally received reward to  
35 compute prediction errors. Additionally, the RL unit has a Switch neuron (see Figure 1C and D).  
36 This Switch neuron computes a weighted sum of negative prediction errors over trials. When this  
37 sum reaches a threshold of .5, it signals the need for a strategy switch to the Control unit (see  
38 Methods for details). This Control unit functions as an Actor in order to drive neural  
39 synchronization in the Processing unit. One part of the Control unit (modeling lateral frontal  
40 cortex (LFC)) contains task units that point to task modules in the Processing unit (15); another  
41 part (modeling posterior medial frontal cortex (pMFC)) synchronizes task modules based on those  
42 task units (16). Crucially, LFC and pMFC both use prediction error information, but on different  
43 time scales. While the LFC uses prediction errors on a slow time scale to know when the task rule  
44 has changed and a switch of modules is needed, the pMFC uses prediction errors on a fast time  
45 scale to enhance control over the synchronization process as soon as a negative prediction error  
46 occurs.

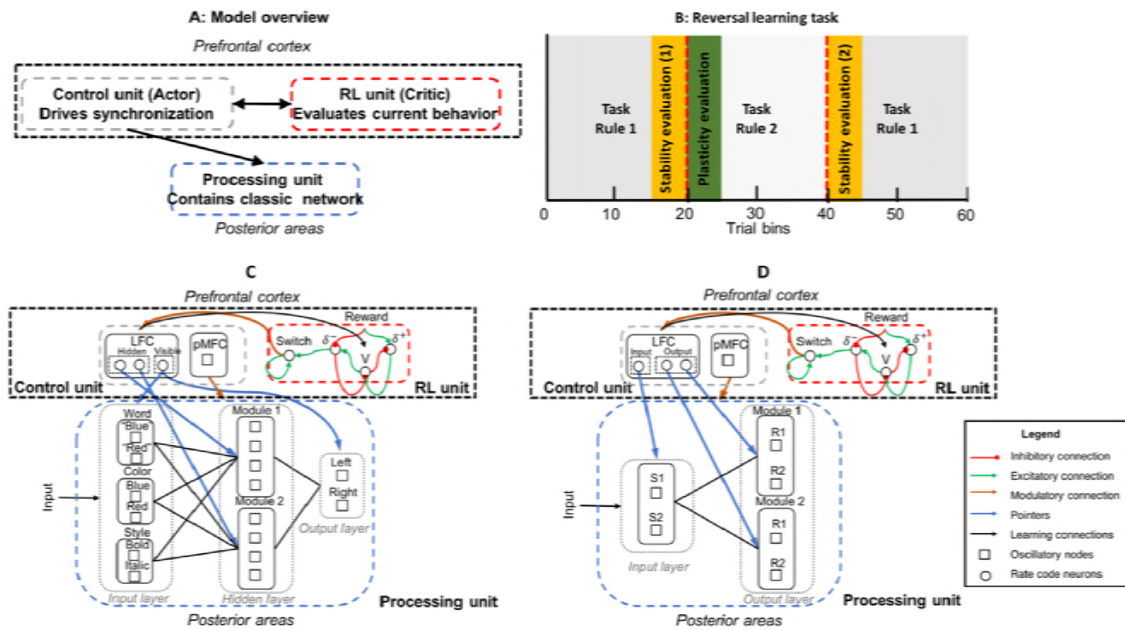

47

48 **Figure 1.** Model and task overview. **A:** General model overview. **B:** Reversal learning task. Trial bin size = 40 trials  
 49 for multi-layer models and trial bin size = 4 trials for models with RW networks (see Methods for details). Red dotted  
 50 vertical lines indicate task switches. **C:** More detailed overview of the multi-layer model in the context of a Stroop  
 51 task. **D:** More detailed overview of the RW model in the context of an S-R associative learning task.

52 In order to drive neural synchronization we rely on the idea of binding by random bursts  
 53 (16–18). Here, applying positively correlated noise to two oscillating signals reduces their phase  
 54 difference. In addition to implementing binding by random bursts, the current work also  
 55 implements unbinding by random bursts. In particular, applying negatively correlated bursts  
 56 increases the phase difference between oscillating signals and thus unbinds (i.e., dephases) the  
 57 two signals.

58 We test our model on a (cognitive control) reversal learning task. Here, each  
 59 hierarchically lower algorithm (e.g., Boltzmann) sequentially learns different task rules. The  
 60 relevant task rule changes during the task (Figure 1B). The model must detect when task rules  
 61 have changed, and flexibly switch between different rules without forgetting what has been  
 62 learned before. Our task is divided in three equally long blocks that alternate between two task  
 63 rules (rule 1-rule 2-rule 1). For the backpropagation and RBM networks (because of their hidden  
 64 layer further called multi-layer networks), a multiple-feature Stroop-like task is used. Here,

65 stimuli are presented that contain three crucial features. They are words (“red” or “blue”) printed  
66 in a certain color (red or blue) and style (bold or italic). There are two response options. The task  
67 is to respond to the word when it is printed in bold and to the color when it is printed in italic.  
68 During rule 1 they should respond with Response 1 (R1) for red and Response 2 (R2) for blue.  
69 This is reversed for rule 2. For the RW network, which cannot handle such complex task rules,  
70 we use simple Stimulus-Response (S-R, linearly separable) associations. According to rule 1, R1  
71 leads to reward after presentation of Stimulus 1 (S1) and R2 leads to reward after presentation of  
72 Stimulus 2 (S2). For rule 2 these associations are reversed, linking R1 with S2 and R2 with S1.  
73 The Stroop-like task consisted of 2400 trials and the S-R associative learning task of 240 trials.  
74 For comparison, we divided them in 60 trial bins for some analyses and plots. Figure 1C and D  
75 illustrate the detailed model build-up in respectively the Stroop-like task and the S-R associative  
76 learning task. We compare our combined (henceforth, full) models with models that only use  
77 synaptic learning (i.e., only contain the Processing unit; called synaptic models). We evaluate  
78 plasticity as the ability to learn a new task after learning a different task; and stability as the  
79 interference of learning a new task on performance on the old task (see Figure 1B and Methods).

80

## Results

### 81 **The stability-plasticity dilemma**

82 *Backpropagation.* Figure 2A-C show a clear advantage for the full relative to the synaptic  
83 backpropagation model in overall accuracy as well as plasticity and stability. This advantage was  
84 present across all learning rates. This advantage appears because the synchronization supports  
85 modularity, thus protecting information from being overwritten.

86 *RBM.* Also panels D-F of Figure 2 show an advantage for the full model relative to the  
87 synaptic RBM model. This advantage is less strong than for the backpropagation model because  
88 the synaptic RBM model shows a stronger plasticity than the synaptic backpropagation model.

89 *RW.* Figure 2G-I shows similar overall accuracy for the full and synaptic RW models.  
90 When synaptic learning rates are slow ( $\beta = .1-.4$ ), the full model has a better stability than the

91 synaptic model. However, this advantage disappears for higher learning rates and the synaptic  
92 model shows a higher plasticity than the full RW model. There is also a dip in performance for  
93 higher learning rates in the full RW based model. Reasons for this dip are explained in the  
94 Methods section.

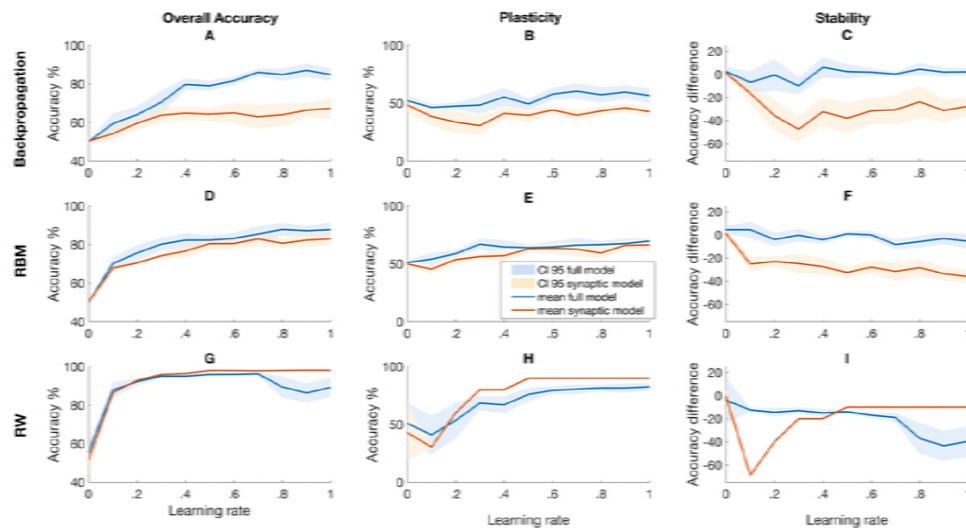

95  
96 **Figure 2.** Performance of models on reversal learning task. Blue lines show means for the full model and orange lines  
97 represent the mean values for the synaptic models. The shades indicate the corresponding 95% confidence intervals.

## 98 **Model dynamics**

99 More insight into the dynamics of the model is given in Figure 3. We show data for  
100 simulations with a learning rate of .3.

101 *A closer look at accuracy.* Figure 3A illustrates the accuracy evolution over the whole  
102 task for both the full and synaptic backpropagation model. During the first part of the task, the  
103 synaptic and full model show a similar performance. When there is a first switch in task rule, the  
104 drop in accuracy is slightly larger for the synaptic model than for the full model. This is caused  
105 by the fact that the synaptic model has to learn task rule 2 with weights that were pushed in the  
106 opposite direction during learning of task rule 1. Instead, the full model switches to another task  
107 module and starts learning from a random weight space. After the second rule switch, there is  
108 again a strong decrease of accuracy in the classic model but not in the full model. Here, the classic  
109 model had to relearn the first task rule (catastrophic forgetting) while the full model switched to  
110 the first module where all old information was retained. As illustrated in Figure 3D, these findings

111 are replicated by the RBM model. In Figure 3G, the accuracy is plotted for the RW model. As  
112 suggested by Figure 2G-I, the full model shows a similar performance during the first part of the  
113 task, a lower plasticity after the first task switch but a higher stability after the second task switch  
114 compared to the synaptic model.

115 *Synchronization of modules.* Figure 3B represents the synchronization between the  
116 input layer and different task modules for the backpropagation model. Here, we see that the model  
117 performs quite well in synchronizing task-relevant and desynchronizing task-irrelevant modules.  
118 Additionally, the model is able to flexibly switch between modules. A similar pattern is observed  
119 in Figure 3E and Figure 3H where the data for respectively the RBM and RW models are shown.  
120 In these plots, we observe wider confidence intervals in some trial bins. This reflects the fact that  
121 the model sometimes also erroneously switches. However, if such an incorrect switch occurs, the  
122 model will also switch back to the correct module.

123 *The Switch neuron.* Figure 3C show activation in the Switch neuron for the  
124 backpropagation model. Crucially, we observe in this plot only two points above the threshold of  
125 .5. These two points are right after the first task rule switch and right after the second task rule  
126 switch. Thus, the model correctly decides when a switch is necessary. A similar phenomenon  
127 occurs in the RBM model (Figure 3F) and the RW model (Figure 3I). The exact dynamics of the  
128 Switch neuron are most clearly observed for the backpropagation model (Figure 3C). During the  
129 first trials of learning a new task rule (approximately trials 1-200 and 800-1000) a new task  
130 module is used. Typically, a new module has not learned anything and makes a lot of errors. Here,  
131 the high number of (prediction) errors during learning is reflected in a constant high activation of  
132 the Switch neuron during these trials. However, a newly used task module also starts with a low  
133 predicted value (variable  $V$ , see equation (7) in Methods) and hence every error only elicits a  
134 small negative prediction error which is not enough for the Switch neuron to reach the threshold.  
135 When the task module learns the task, it produces less errors but it also learns to assign a high  
136 value to that module, resulting in stronger prediction errors when an error occurs. Hence, in later  
137 trials there is a weaker mean activation in the Switch neuron of almost zero, with occasional



138 strong bursts of activity when a rare prediction error does occur. However, also this is typically  
 139 not enough to reach the Switch threshold. The Switch threshold is only reached when a module  
 140 that has a high value assigned to it, makes several consecutive errors. This typically means that  
 141 the module is used in the wrong context and hence a switch is needed. After the second task  
 142 switch, activation in the Switch neuron of the backpropagation model (Figure 3C) remains at zero.  
 143 This is because the model reached full convergence and makes no errors anymore. This is not  
 144 observed in the RBM model (Figure 3F) because it uses a probabilistic response threshold,  
 145 making the model always susceptible to a small number of errors. Finally, activation of the Switch  
 146 neuron for the RW model (Figure 3I) after every switch almost immediate converges towards  
 147 zero, indicating that the RW learning algorithm is very fast and efficient.

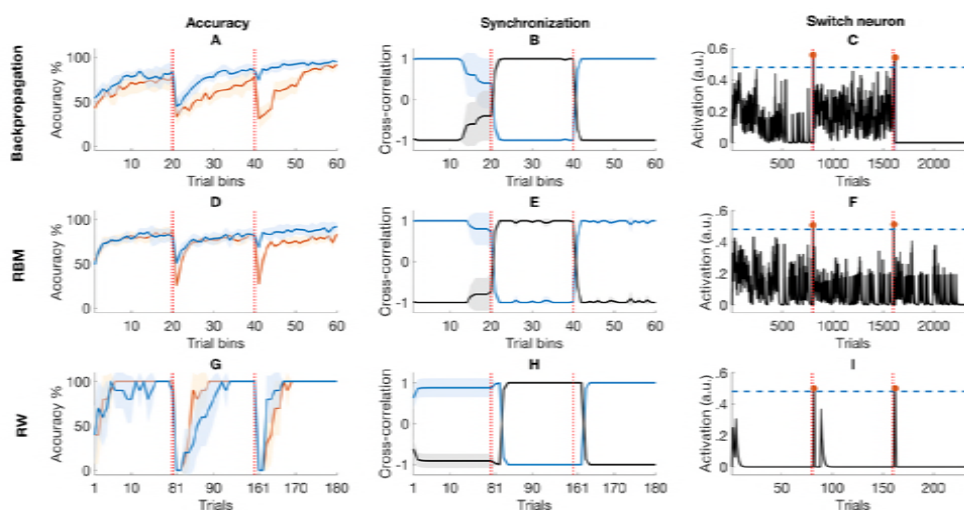

148  
 149 **Figure 3.** *Model data.* Model dynamics are shown for simulations with a learning rate of .3. In column 1 (panels A, D  
 150 and G), the blue lines represent data of the full model and the orange lines represent data for the synaptic model. In  
 151 column 2 (panels B, E and H), blue lines represent values for the initially (randomly) chosen module and black lines  
 152 for the other module. In column 3 (panels C, F and I), activity of the Switch neuron (see Figure 1C and D) is shown for  
 153 one selected simulation of the model (in black). Blue horizontal dashed lines indicate the threshold of the Switch neuron  
 154 and the orange dots indicate data points above the threshold. In all panels, red vertical dotted lines indicate task switches  
 155 and shades indicate 95% confidence intervals.

### 156 **Connections with empirical data**

157 As a model of how the brain controls its own processing, we next aimed at connecting  
 158 with empirical data and describe testable hypotheses for future empirical work. For reasons

159 described in the Methods section we only present data for the backpropagation and RW model  
160 here.

161 *Feedback Related Negativity.* As described in the Methods section, theta amplitude in  
162 the pMFC gradually decayed during the whole task. However, when a negative prediction error  
163 occurred the pMFC network node received a burst which increased its amplitude again. This can  
164 be clearly observed in the ERP that is plotted in Figure 4A for the backpropagation model and  
165 Figure 4D for the RW model. Here, the bursts occurring from approximately 100 to 300 ms after  
166 feedback results in a strong negative peak around 200 msec, corresponding to the empirical  
167 feedback related negativity (FRN; e.g., 19–24).

168 *Theta power.* Additionally, we performed time-frequency decomposition of the signal  
169 produced by the pMFC node. More specifically, we were interested in theta power after feedback.  
170 We computed the contrast of power in the inter-trial interval after error and after correct trials in  
171 the time-frequency domain. Also here, and in accordance with previous empirical work (e.g., 24–  
172 26), we clearly observe increasing theta power, starting 200 ms after negative feedback. Again,  
173 this is shown both for the backpropagation (Figure 4B) and RW (Figure 4E) model.

174 *Phase-amplitude coupling.* Figure 4C, F illustrate the coupling between the phase of  
175 theta-oscillations in the pMFC and gamma amplitude in the Processing unit. Again consistent  
176 with empirical data (27,28), these plots show a clear increase in phase-amplitude coupling after a  
177 task rule switch. This is mainly caused by the fact that there are many negative prediction errors  
178 in these trials. These prediction errors increase theta power in the pMFC which in turn increases  
179 the number of bursts received by the gamma oscillations in the Processing unit (see Methods).  
180 This combination of events results in an increase of phase-amplitude coupling (PAC).

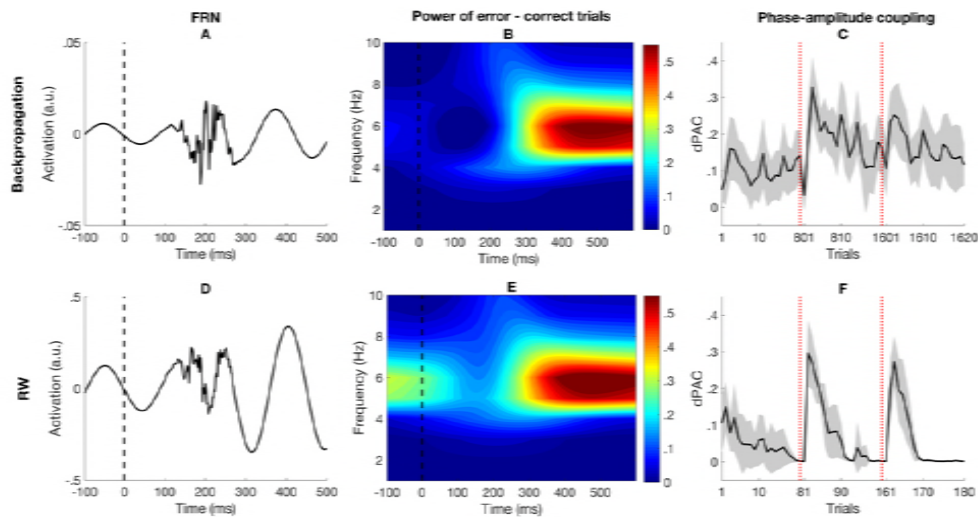

181

182 **Figure 4.** Model predictions for empirical data. Black vertical dashed lines indicate the moment of reward feedback.

183 Red vertical dotted lines indicate task switches. Shades illustrate 95% confidence intervals.

184

## Discussion

185

186 We described a computationally efficient and biologically plausible framework on how  
187 biological and artificial agents may deal with the stability-plasticity dilemma. We combined two  
188 neurocomputational frameworks, BBS (2–4) and RL (6). BBS flexibly (un)binds (ir)relevant  
189 neural modules and RL autonomously discovers which modules need to be (un)bound. Thus, the  
190 model could flexibly switch between different tasks (plasticity) without catastrophically  
191 forgetting older information (stability). We demonstrated that the model was consistent with  
192 several behavioral and electrophysiological (e.g., EEG/MEG) data.

192

193 Our model consists of three units. The Processing unit contains a task-processing  
194 network, trained by a classical learning rule (backpropagation, RBM or RW). Anatomically, it  
195 can be localized in several posterior (neo-)cortical processing areas, depending on the task at  
196 hand. Its activity is strongly stimulus-dependent and synaptic strengths change slowly. The RL  
197 unit learns to attach value to specific task modules, based on prediction errors. It is localized most  
198 plausibly in MFC, which (with brainstem and striatum) is generally considered as an RL circuit  
199 (9,29,30). However, computations in this unit are not used for driving task-related actions, but for  
driving hierarchically-higher actions, namely to (de)synchronize task modules. This is in line with

200 recent considerations of MFC as a meta-learner (31–34). We tentatively call this unit aMFC, given  
201 this region’s prominent anatomical connectivity to autonomous regions (35).

202         The Control unit was adopted from (16). Its first part contains units that point to specific  
203 posterior processing areas, indicating which neurons should be (un)bound. Thus, this area stores  
204 the task demands. We labeled this part LFC, given the prominent role of LFC in this regard  
205 (36,37). Its second part sends random bursts to posterior processing areas to synchronize currently  
206 active areas. Given the prominent anatomical connectivity of pMFC to motor control and several  
207 posterior processing areas (35) we tentatively label this part pMFC. The efficiency of this  
208 controlling process is largely determined by pMFC theta power: More power leads to more and  
209 longer bursts (16). This is consistent with empirical work linking high MFC theta power to  
210 efficient cognitive control (26,27). Power in the model pMFC is modulated by the occurrence of  
211 negative prediction errors. More specifically, when a negative prediction error occurs, the pMFC  
212 node will receive bursts which will increase theta power. In absence of negative prediction errors,  
213 this theta power will slowly decrease across trials. This is consistent with the idea that a constant  
214 high MFC power might be computationally suboptimal and empirically implausible. For instance,  
215 MFC projects to locus coeruleus (LC;(38)); LC firing is thought to be cognitively costly, perhaps  
216 because it leads to waste product in the cortex that needs to be disposed (39). In sum, in the  
217 Control unit, LFC and pMFC jointly align neural synchronization in modules of the Processing  
218 unit to meet current task demands (40,41). Here, the LFC will indicate which modules should be  
219 (de)synchronized and the pMFC will exert control over the oscillations in the Processing unit by  
220 (de)synchronizing them via random bursts.

221         Crucially, both Control units use prediction errors, but at a different time scale. The  
222 decision of which modules should be synchronized is based on an evaluation of multiple recent  
223 prediction errors in the Switch neuron of the RL unit (slow time scale). The pMFC on the other  
224 hand will use an evaluation of the last prediction error to evaluate the amount of control that  
225 should be exerted (fast time scale). Hence, when an error occurs, the model will initially exert

226 more control on the currently used task module/strategy. If negative prediction errors keep on  
227 occurring after the model increased control, it will switch modules/strategies.

228           Because of its higher plasticity and stability, the full model achieved higher accuracy  
229 than the synaptic models. The full model performed better across all learning rates with  
230 backpropagation or RBM. With RW, both models showed similar performance for slow learning  
231 rates but the synaptic model performed better with fast learning rates. Thus, for simple (linearly  
232 separable) learning problems that can be solved very fast, the need for stability is obviated and  
233 the advantage of synchronization disappears.

### 234 **Experimental predictions**

235           Importantly, our model made several predictions for empirical data. First, it predicts  
236 significant changes in the phase coupling between different posterior neo-cortical brain areas after  
237 a task switch. Here, we suggest that desynchronization may be important to disengage from the  
238 current task. Consistently, (42) found that strong desynchronization marked the period from the  
239 moment of disambiguation of ambiguous stimuli to motor responses. Additionally, Parkinson  
240 disease patients, often characterized by extreme cognitive rigidity, show abnormally  
241 synchronized oscillatory activity (43). Second, we explored midfrontal theta-activation in the time  
242 domain by computing the ERP and in time-frequency domain by wavelet convolution. Both  
243 analyses showed an increase of theta-power after an error. This was caused by bursts received  
244 from the RL unit which elicited a negative peak at approximately 200 ms, corresponding to the  
245 FRN (e.g., 19,21,24). Third, we connected the model to research demonstrating theta/gamma  
246 interactions where faster gamma frequencies, which implement bottom-up processes, are  
247 typically embedded in and modulated by slower theta-oscillations, which implement top-down  
248 processes (28,44–46). For this purpose, we considered coupling between pMFC theta phase and  
249 gamma amplitude in the Processing unit. Our model predicts a strong PAC increase in the first  
250 trial(s) after task switch. This reflects the binding by random bursts control process which is  
251 increased after task switches.

## 252 **Limitations and extensions**

253           First, because we mainly focused on the biological plausibility and empirical testability  
254 of the current model we limited the complexity of the model, especially at its hierarchically higher  
255 levels. In its current organization, the model can only determine when a task switch occurred and  
256 then make a binary switch to another task module. Hence, the current version of the model can  
257 only switch between two task sets. Future work will address this problem by adding second level  
258 (contextual) features which allow the LFC to (learn to) infer which of multiple task modules  
259 should be synchronized. One useful application of such second level features would be task set  
260 clustering, which allows to generalize over multiple contexts. Specifically, if a second-level  
261 feature becomes connected to an earlier learned task set, all the task-specific mappings would be  
262 immediately generalized to the novel second-level feature. This is consistent with immediate  
263 generalization seen in humans (47–49).

264           Second, our model uses both synchronization and desynchronization which leads to full  
265 synaptic gating of task-(ir)relevant modules. It might be suboptimal to always desynchronize all  
266 modules that are not currently task-relevant. As suggested by previous work (50), keeping the  
267 irrelevant modules at random states (partial gating) might be sufficient to eliminate catastrophic  
268 forgetting.

269           Third, although using negative prediction errors to modulate the control amplitude of the  
270 pMFC might be efficient in the current context, this might not be ideal for more complex  
271 environments. Thus, a future challenge is combining our model with earlier work that described  
272 how a model can (meta-)learn to optimally modulate pMFC activation depending on the  
273 environment's reward and cost structure (32).

274           Fourth, the model ignored some aspects of oscillatory dynamics. For instance, our model  
275 only implements neural synchronization with zero phase lag; yet BBS may be more biologically  
276 plausible, and more efficient, with small inter-areal delays (51). Future work will consider an  
277 additional (meta-) learning mechanism that learns to synchronize nodes with an optimal phase  
278 delay. Additionally, all Processing unit nodes oscillated at the exact same frequency. This

279 scenario might be unrealistic in a typically noisy human brain. Nevertheless, modeling work  
280 shows that two oscillators can learn to oscillate at the same frequency via Hebbian Learning (52)  
281 in the coupling weights (parameter  $C$  in equations (1) and (2)). Moreover, this problem is  
282 efficiently solved by using a theta-rhythm for delivering the synchronizing bursts, as we  
283 implemented here. Specifically, too low-frequency bursts would cause oscillations with (slightly)  
284 different (gamma-band) frequencies to drift apart again. With bursts given at a theta-frequency  
285 the gamma oscillations have no time to drift apart since the next period of burst occurs before this  
286 can happen. In line with this idea, previous work has demonstrated how the model can deal with  
287 frequency differences of at least around 2% (16). One might wonder then if the burst frequency  
288 could be even higher than theta; however, too high-frequency bursts would result in too noisy  
289 signals in the Processing unit. In this sense, theta frequency might strike an optimal balance for  
290 guiding gamma oscillations.

### 291 **Related work**

292 The current work relies heavily on previous modeling work of cognitive control  
293 processes. For instance, in the current model the LFC functions as a holder of task sets which bias  
294 lower-level processing pathways (15,53). It does this in cooperation with the MFC. Here, the  
295 MFC determines which lower-level task module receives control over behavior (29). The MFC  
296 makes this decision based on an RL algorithm (6,9). Hence, the synchronization process in the  
297 current model can also be seen as a reinforcement-driven form of synaptic gating (54,55). In  
298 biological systems, such gating is plausibly modulated by dopamine. Additionally, also the  
299 amount of control/ effort that is exerted in the model is determined by the RL processes in the  
300 MFC(31–33). More specifically, negative prediction errors will determine the amount of control  
301 that is needed by strongly increasing the MFC signal (29). This is consistent with earlier work  
302 proposing a key role of MFC in effort allocation (31,32,56).

303 In the current model, the MFC thus functions as a hierarchically higher Actor-Critic  
304 structure that uses reinforcement learning to estimate its own proficiency in certain tasks. Based  
305 on its estimate of the value of a module, and the reward that actually accumulates across trials, it



306 evaluates whether the current task strategy is suited for the current environment. Based on this  
307 evaluation, it will decide to stay with the current strategy or switch to another. This is in line with  
308 previous modeling work that described the prefrontal cortex as a reinforcement meta-learner  
309 (30,33–35).

310           One problem we addressed in this work was the stability-plasticity dilemma. Previous  
311 work on this dilemma can broadly be divided in two classes of solutions. The first class is based  
312 on the fact that catastrophic forgetting does not occur when two tasks are intermixed. Thus, one  
313 solution is to keep on mixing old and new information (57–60). McClelland et al. (58) suggested  
314 that new information is temporarily retained in hippocampus. During sleep (and other offline  
315 periods), this information is gradually intermixed with old information stored in cortex. This  
316 framework inspired subsequent computational and empirical work on cortical-hippocampal  
317 interactions (61–63).

318           The second class of solutions is based on the protection of old information from being  
319 overwritten. Protection can occur at the level of synapses. For example, (64) combined a slow  
320 and fast learning system, with slow and fast weights reflecting long- and short-time-scale  
321 contingencies, respectively. Another recent idea is to let synapses (meta-)learn their own  
322 importance for a certain task (65,66). Weights that are very important for some task are not  
323 allowed to change. Hence, information encoded in those weights is preserved. Protection can also  
324 be implemented at activation-level. The most straightforward approach to implement such  
325 protection is to orthogonalize input patterns for the two tasks (67,68). A broader solution is gating.  
326 This means that only a selected number of network nodes can be activated. Because weight  
327 change depends on co-activation of relevant neurons (12,69), this approach protects the weights  
328 from changing. For example, Masse et al. (50) propose that in each of several contexts, a  
329 (randomly selected) 80% of nodes is gated out, thus effectively orthogonalizing different  
330 contexts. They showed that synaptic gating allowed a multi-layer network to deal with several  
331 computationally demanding tasks without catastrophic forgetting. However, it was unclear how  
332 their solution could be biologically implemented. Our solution also exploited the principle of



333 protection. Future work must develop biologically plausible implementations of the mixing  
334 principle too and investigate to what extent mixing and protection scale up to larger data sets.

### 335 **Summary**

336 We provided a computationally efficient and biologically plausible framework on how  
337 neural networks can address the tradeoff between being sufficiently adaptive to novel  
338 information, while retaining valuable earlier regularities (stability-plasticity dilemma). We  
339 demonstrated how this problem can be solved by adding fast BBS and RL on top of a classic slow  
340 synaptic learning network. RL is used to synchronize task-relevant and desynchronize task-  
341 irrelevant modules. This allows high plasticity in task-relevant modules while retaining stability  
342 in task-irrelevant modules. Furthermore, we connected the model with empirical findings and  
343 provided predictions for future empirical work.

## 344 **Methods**

### 345 **The models**

346 As mentioned before and is shown in Figure 1A, our model consists of three units. First,  
347 the Processing unit includes the task-related neural network, which is trained with a classical  
348 learning rule (backpropagation, Boltzmann, or Rescorla-Wagner). On top of this classical  
349 network, an extra hierarchical layer is added where two other units together constitute an Actor-  
350 Critic structure (14). The RL unit, adopted from the RVPM (9), functions as Critic and evaluates  
351 whether the Processing unit is synchronizing the correct task modules. This evaluation is used by  
352 the Control unit (16), which functions as an Actor to drive neural synchronization in the  
353 Processing unit. Thus, the Actor-Critic structure allows the models to implement BBS in an  
354 unsupervised manner.

355

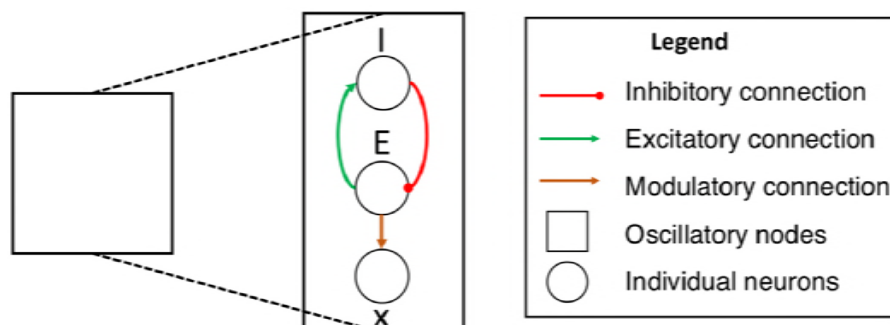

356

357 **Figure 5.** *Network node.* Illustration of one oscillatory node in the network (see Figure 1C-D), consisting  
 358 of a triplet of neurons.

359 *The Processing unit.* An important feature of the current model is that all nodes in the  
 360 Processing unit consist of triplets of neurons (Figure 5), as in (16). Equations (1)-(5) are taken  
 361 from (16), but we reproduce them here for readability. Each triplet (node) contains one classical  
 362 rate code neuron (with activation  $x_i$ ) which receives, processes and transmits information; and one  
 363 pair of phase code neurons ( $E_i, I_i$ ) which organizes processing in the rate code neurons. In line  
 364 with previous work (16), excitatory neurons are updated by

$$E_i(t + dt) = E_i(t) - C \times I_i(t) - D \times J(r > r_{\min}) \times E_i(t) + B_i(t) \quad (1)$$

365 and inhibitory neurons are updated by

$$I_i(t + dt) = I_i(t) + C \times E_i(t) - D \times J(r > r_{\min}) \times I_i(t) \quad (2)$$

366 The two phase code neurons are thus coupled by a parameter  $C$ , causing them to oscillate. The  
 367 strength of the coupling ( $C$ ) determines the frequency of the oscillations,  $C/(2\pi)$  (16,70). Task-  
 368 relevant modules in the processing unit must be bound together. Previous research has proposed  
 369 that such binding is supported by oscillations in the gamma-frequency band (30-70 Hz; 4). We  
 370 therefore chose a value for  $C$  corresponding to a frequency of  $\sim 40$  Hz. The variable  $t$  refers to  
 371 time, and  $dt$  refers to a time step of 2 msec. The radius ( $r = E^2 + I^2$ ) of the oscillations are attracted  
 372 towards the value  $r_{\min} = 1$ . This is implemented by the term  $D \times J(r > r_{\min}) \times E_i(t)$  in equation (1) and

373  $D \times J(r > r_{\min}) \times I_i(t)$  in equation (2). Here,  $J(\cdot)$  is an indicator function, returning 1 when the radius  
374 is higher than the value of  $r_{\min}$  and 0 otherwise. The damping parameter,  $D = .3$ , determines the  
375 strength of attraction. The excitatory neurons of the Processing unit additionally receive a burst,

$$B_i(t) = LFC_i \times pMFC(t) \times U(t) \quad (3)$$

376 Here, the LFC and pMFC (see Control unit) together determine the burst signal,  $B_i(t)$ , that is  
377 received by the excitatory phase code ( $E$ ) neurons. The variable  $U(t)$  is a standardized-Gaussian  
378 variable.

379 The rate code neuron is updated by

$$dx_i(t) = -x_i(t) + f(net_i - bias) \times G(E_i(t)) \quad (4)$$

380 The term  $-x_i(t)$  will cause fast decay of activation in absence of input. According to this equation,  
381 the activation of the rate code neuron at every time step is a function of the net input ( $net_i$ ) for that  
382 neuron multiplied by a function of the excitatory phase code neuron (16),

$$G(E_i(t)) = \frac{1}{1 + e^{(-5 \times (E_i(t) - .6))}} \quad (5)$$

383 For the multi-layer networks, the rate code neurons have a sigmoid activation function  $f(net_i - bias)$   
384  $= \frac{1}{1 + e^{-(net_i - bias)}}$ . Additionally, these rate code neurons receive a  $bias = 5$  to set activation to  
385 (approximately) zero in absence of input. In the RW network, the rate code neurons have no bias  
386 and follow a linear activation function;  $f(net_i - bias) = net_i$ .

387 Additionally, all weights ( $W$ ) in the Processing unit are subject to learning. Here,  
388 learning is done according to one of the three classic learning rules; backpropagation, RBM or  
389 RW (10,11,13). A new learning step was executed at the end of every trial. Because activation in  
390 the rate code neurons is modulated by  $G(E_i)$ , the activation patterns  $x_i$  also oscillate. For  
391 simplicity, we use their maximum activation across one trial as input for the learning rules,  
392  $X_i = \max(x_i)$ . Importantly, the standard formulation of the Rescorla-Wagner rule does not combine  
393 well with the full model because, in this combination also non-active units would be able learn.  
394 To remedy this, a small adjustment was made to the learning rule (13) for the full model.

395 Specifically, we added one term to the classic rule in order to only make co-activated neurons  
396 eligible for learning, resulting in

$$\Delta W_{io} = (Target - X_o) \times X_i \times X_o \quad (6)$$

397 Importantly, this adjustment of the learning rule also results in some costs. First, plasticity  
398 decreases because the added term ( $X_o$ ) represents the activation of the output unit, which is  
399 typically lower than 1 and hence slows down learning. Second, there is a problem at higher  
400 learning rates where weights converge to zero and become unable to learn (see dip in Figure 2G).  
401 Because the synaptic model obtains no advantage of this adjusted learning rule and we aimed to  
402 give the classic model the best chances for competing with the full model, we only used the  
403 adjusted learning rule (equation (6)) for the full model.

404 For the backpropagation and RW networks, a trial ended after 500 time steps (1 sec).  
405 Here, the first 250 time steps (500 msec) were simulated as an inter-trial interval in which the  
406 Rate code neurons ( $x$ ) did not receive input. In the next 250 time steps, input was presented to the  
407 networks. The RBM network also started a trial with 250 time steps without stimulation of the  
408 Rate code neurons. After this inter-trial interval the network employs iterations of bidirectional  
409 information flow to estimate the necessary synaptic change (11). We used 5 iterations. Every  
410 iteration step (2 in one iteration; one step for each direction of information flow) lasted for 250  
411 time steps. The RBM algorithm also employs stochastic binarization of activation levels at each  
412 iteration step. Also here, we used the maximum activation over all time steps ( $X_i$ ) to extract a  
413 binary input for that neuron in the next iteration step.

414 As mentioned in the main text, we compare our new (full) models to models that only  
415 use synaptic learning (synaptic models). Thus, those synaptic models only have a Processing unit.  
416 Here, all used equations and parameters are the same as described above, except for the synaptic  
417 RW model where we use the classic learning rule instead of the one described in equation (6).  
418 The only difference is that they do not have phase code neurons and by consequence,  $G(E_i(t)) =$   
419 1 in equation (5).

420 *The RL unit.* As RL unit, we implemented the Reward Value Prediction Model (RVPM;  
421 Silvetti et al., 2011). Here, there is one expected reward neuron,  $V$ , which holds an estimation of  
422 the reward the model will receive given the task module it used. This estimation is made by

$$V = \mathbf{Z}^T \times (\mathbf{LFC} + 1)/2 \quad (7)$$

423 In this equation,  $\mathbf{Z}$  is a (column) vector representing the synaptic connections from LFC neurons  
424 to the  $V$  neuron as presented in Figure 1C, D. This vector holds information about the value of  
425 specific task modules. Superscript  $T$  indicates that we transposed the  $\mathbf{Z}$  vector. The  $\mathbf{LFC}$ -term is  
426 a vector of LFC values representing which task module drove network behavior on the current  
427 trial. These values are normalized, controlling for the fact that LFC neurons can take on negative  
428 values. Hence,  $V$  will represent the expected value of the task module that is synchronized by the  
429 LFC represented in the  $\mathbf{Z}$  vector. These weights are updated by the RVPM learning rule (9), which  
430 is a reinforcement-modulated Hebbian learning rule from the broader class of RL algorithms. All  
431 neurons in the RL unit, are rate code neurons which have no time index because they only take  
432 one value per trial.

433 Two prediction error neurons in the RL unit compare the estimated reward ( $V$ ) with the  
434 actual received reward. This leads to a negative prediction error  $\delta^- > 0$  if the reward is smaller  
435 than predicted,  $\delta^+ > 0$  if the reward is larger than predicted, and  $\delta^- = \delta^+ = 0$  if the prediction  
436 matches the actual reward (see Silvetti et al. (2011) for more details). The current model  
437 accumulates this prediction error signal over several trials to evaluate whether the task rule has  
438 changed or not. More specifically, a Switch neuron ( $S$ ) computes a weighted sum of negative

439 prediction errors to determine whether the network is currently using the correct task module.  
 440 When there is a rapid succession of negative prediction errors, this probably means the task rule  
 441 has changed. Hence, the network should switch to another strategy. Consequently, activation in  
 442 the Switch neuron follows

$$S_{n+1} = \sigma \times S_n + (1 - \sigma) \times \delta_n^- \quad (8)$$

443 Here, the value of  $\sigma$  is set to .8 for the multi-layer models and .5 for the RW model. When  
 444 activation in this neuron reaches a threshold of .5, it signals the need for a switch to the Control  
 445 unit (see also equation (12)) and resets its own activation to zero. In the equation,  $n$  refers to the  
 446 trial number.

447 **The Control unit.** As in previous work (16), the Control unit consists of two parts,  
 448 corresponding to posterior medial (pMFC) and lateral (LFC) parts of the primate prefrontal  
 449 cortex.

450 The modelled pMFC represents one node (Figure 5) consisting of one phase code pair  
 451 ( $E_{pMFC}$ ,  $I_{pMFC}$ ) and a rate code neuron ( $pMFC$ ). The phase code neurons obey the same updating  
 452 rules as given by equation (1) and (2). In the pMFC, which executes top-down control, the value  
 453 of  $C$  is such that oscillations are at a 5Hz (theta-) frequency, in line with suggestions of previous  
 454 empirical work (26,27). Since a constant high MFC power is computationally suboptimal and  
 455 empirically implausible (39), the radius of the pMFC was attracted towards a small radius,  
 456  $r_{min}=.05$ . The damping parameter was set to  $D = .03$ , in order to let the amplitude of the pMFC  
 457 oscillations decay slowly over trials. The burst signal of the pMFC was determined by the  
 458 negative prediction error signal of the previous trial,

$$B_{pMFC}(n,t) = \delta_n^- * Be\left(e^{\frac{-(t-100)^2}{2 \times 12.5^2}}\right) \quad (9)$$

459 Here, the burst signal at one time point in one trial is determined by the size of the negative  
 460 prediction error at the previous trial and a Bernoulli process  $Be(p(t))$  which is one with probability  
 461  $P(t)$ . The probability  $P(t)$  corresponds to a Gaussian distribution over time that has its peak at 100  
 462 time steps and a standard deviation of 12.5 time steps, representing a delay of communication

463 between the pMFC and the RL unit. Hence, when the previous trial elicited a negative prediction  
464 error, bursts are sent to the excitatory neuron of the pMFC. Consequently, these bursts have the  
465 size of the negative prediction error and are most likely to occur at 100 time steps (200 ms) after  
466 feedback. This burst signal will increase the amplitude of the pMFC phase code neurons when a  
467 negative prediction occurs, after which it will again slowly decay towards  $r_{\min}$ .

468 In line with the previous study (16), activation in the rate code neuron of the pMFC  
469 follows

$$pMFC(t) = Be(p) \quad (10)$$

470 Again, this equation represents a Bernoulli process  $Be(p)$  which is 1 with probability  $p$ . The  
471 probability

$$p = \frac{1}{1 + e^{(-10 \times (E_{pMFC(t)} - 1))}} \quad (11)$$

472 is a sigmoid function which has its greatest value when the  $E_{pMFC(t)}$  is near its top and its amplitude  
473 is sufficiently strong. Hence, every time the oscillation of the  $E_{pMFC}$ -neuron reaches its top, the  
474 probability of a burst becomes high. Thus, bursts are phase-locked to the theta oscillation,  
475 implying that the pMFC determines the ‘when’ of the bursts (see (16) for more details).

476 In general, the model implements a “win stay, lose shift” strategy, shifting attention in  
477 LFC when reward appears less than expected. As shown in Figure 1C, D, the LFC consists of  
478 three rate code neurons that each have a pointer to one (or two) of the different modules in the  
479 Processing unit. One of these LFC neurons is connected to the visible layers (input and output)  
480 for the multi-layer networks and the input layer for the RW network and has a constant value of  
481 1. Each of the other two LFC neurons are connected to one of the two modules in the hidden, or  
482 in the case of the RW network, the output layer. For these neurons, at trial  $n = 1$  a random choice  
483 is made where one neuron is set to 1 and the other to -1. In trials  $n > 1$ , they obey

$$LFC_{(n+1)} = LFC_n \times (-1)^{J(S > .5)} \quad (12)$$

484 Hence, the network always synchronizes one task module with the in- and output layers and  
485 desynchronizes the other task module. When the Switch neuron,  $S$ , reaches the threshold,  
486 indicator function  $J(\cdot)$  will return 1 instead of 0. This will change the sign in both LFC neurons  
487 connected to the task modules and therefore synchronize the previously desynchronized module  
488 and vice versa. This can easily be scaled up to more modules and more task rules by letting the  
489 model make a random choice or including context-specific input.

#### 490 **The task**

491 We test our model on a reversal learning task (71,72). We divide the task in three equally  
492 long parts. In the first two parts, the model should learn two different new task rules (rule 1 and  
493 rule 2 in parts 1 and 2, respectively). In the third part, the model has to switch back to following  
494 rule 1.

495 In the context of the multi-layer networks, we chose a Stroop-like task consisting of  
496 2400 trials in total. Stimuli contain three crucial features. They are words (“red” or “blue”) printed  
497 in a certain color (red or blue) and style (bold or italic). There are two response options. The task  
498 is to respond to the word when it is printed in bold and to the color when it is printed in italic.  
499 During rule 1 they should respond with R1 for red and R2 for blue. This is reversed for rule 2.  
500 All stimuli are presented equally often in random order.

501 For the RW network, which cannot handle such complex task rules, we use simple S-R  
502 associations as task rules. According to rule 1, R1 leads to reward after presentation of S1 and R2  
503 leads to reward after presentation of S2. For rule 2 these associations are reversed, linking R1  
504 with S2 and R2 with S1. Here, the task is divided in three parts of 80 trials each, making a total  
505 of 240 trials. Again, in each part, each possible stimulus is presented equally often in random  
506 order.

#### 507 **Simulations**

508 To test the generality of our findings, we varied the synaptic learning rate. This parameter  
509 was varied from 0 to 1 in 11 steps of .1. For each value, we performed 10 replications of the



510 simulation. In every simulation, the strength of synaptic connections at trial 1 was a random  
511 number drawn from the uniform distribution, multiplied by the bias value (and 1 for the RW based  
512 model).

513 The effects of other model parameters were already demonstrated in previous work  
514 (9,16), but we again validated that the model shows qualitatively similar patterns when we varied  
515 some of the parameters. This was true when we changed the frequency  $C/2\pi$  of oscillations in the  
516 Processing unit to 30 Hz; attracted the pMFC amplitude to a value  $r_{\min}=.5$ ; used a Switch threshold  
517 of .45 or .55 in equation (12); or varied the learning rate in the RL unit.

### 518 **Statistical analyses**

519 For the purpose of comparison, we divided the trials of the task for every model into 60  
520 bins. For the RW based model, bin size equals 4 trials; for the multi-layer models, bin size equals  
521 40 trials. We evaluate the performance of our model on several levels. First, we evaluate overall  
522 task accuracy. Second, we evaluate plasticity. For this purpose, we explore the performance of  
523 the model right after the switch from task rule 1 to task rule 2; we compute the mean accuracy on  
524 the first 5 bins after the switch. Third, we evaluate stability. In particular, we explore the  
525 interference of learning task rule 2 in between two periods of performing on task rule 1. For this  
526 purpose, we compare the accuracy right after (5 bins) the second switch and right before the first  
527 switch (5 bins). If the model saved what it has learned about task rule 1, this difference should be  
528 zero. If the model displays catastrophic forgetting it would have a negative stability score.

529 Importantly, we also connect with empirical data and describe testable hypotheses for  
530 future empirical work. Because the multiple iterations performed by the RBM algorithm render  
531 it more complex to extract the oscillatory data, and because this algorithm is less biologically  
532 plausible, we focused these analyses on the backpropagation and RW model. As a measure of  
533 phase synchronization between excitatory neurons in the Processing unit, we compute the  
534 correlation at phase lag zero. A correlation of 1 indicates complete synchronization and -1

535 indicates complete desynchronization. Phase-amplitude coupling (PAC) is computed as the  
536 debiased phase-amplitude coupling measure (dPAC; 25) in each trial. Here,

$$dPAC = \left| \frac{1}{h} \sum_{t=1}^h a_t \times (e^{i\varphi_t} - \Phi^-) \right| \quad (13)$$

537 in which

$$\Phi^- = \frac{1}{h} \sum_{t=1}^h e^{i\varphi_t} \quad (14)$$

538 In these equations,  $t$  represents one time step in a trial,  $h$  is the number of time steps in a trial,  $a$   
539 is the amplitude,  $\varphi$  is the phase of a signal, and  $i^2 = -1$ . In the current paper, we are interested in  
540 the coupling between the phase of the theta oscillation in the pMFC node of the Control unit and  
541 the gamma amplitude in the Processing unit. Phase was extracted by taking the analytical phase  
542 after a Hilbert transform. The gamma amplitude was derived as the mean of the excitatory phase  
543 code activation of all nodes in the Processing unit by

$$a_t = \frac{1}{I} \sum_{i=1}^I |E_{it}| \quad (15)$$

544 with  $I$  being the number of nodes in the Processing unit,  $t$  referring to time and  $E_i$  being the  
545 respective excitatory phase code neuron.

546 For all measures, we represent the mean value over  $Nrep = 10$  replications and error bars  
547 or shades show the confidence interval computed by  $\text{mean} \pm 2 \times (\text{SD} / \sqrt{Nrep})$ .

548 Additionally, we evaluated the pMFC theta activation. First, in order to illustrate the  
549 bursts described in equation (10), we computed the ERP during the intertrial interval after error  
550 trials. Second, we evaluated power in the time frequency domain. Time–frequency signal  
551 decomposition was performed by convolving the signal (e.g., for an  $E$  neuron) by complex Morlet  
552 wavelets,  $e^{i2\pi ft} e^{-t^2/(2\sigma^2)}$ , where  $i^2 = -1$ ,  $t$  is time,  $f$  is frequency, ranging from 1 to 10 in 10 linearly  
553 spaced steps, and  $\sigma = 4/(2\pi f)$  is the “width” of the wavelet. Power at time step  $t$  was then computed  
554 as the squared magnitude of the complex signal at time  $t$  and frequency  $f$ . We averaged this power

555 over all simulations and all replications of our simulations. This power was evaluated by taking  
556 the contrast between the inter-trial intervals following correct (1) and error (0) reward feedback.

557 **Data and software availability**

558 Matlab codes that were used for both the model simulations and data analysis are available on  
559 GitHub ([https://github.com/CogComNeuroSci/PieterV\\_public](https://github.com/CogComNeuroSci/PieterV_public)). We will also provide adapted  
560 versions of this code for use with Python.

561

562 ***Conflict of interest:***

563 The authors declare to have no conflict of interest.

564

565 ***Acknowledgements:***

566 The current work was supported by grant BOF17/GOA/004 from the Ghent University Research  
567 Council. PV was also supported by grant 1102519N from Research Foundation Flanders. We  
568 thank Daniele Marinazzo and Cristian Buc Calderon for helpful comments.

569

570

**References**

- 571 1. French RM. Catastrophic forgetting in connectionist networks. Trends Cogn Sci.  
572 1999;6613(April):128–35.
- 573 2. Fries P. Rhythms for Cognition: Communication through Coherence. Neuron [Internet].  
574 2015;88(1):220–35. Available from:  
575 <http://linkinghub.elsevier.com/retrieve/pii/S0896627315008235>
- 576 3. Fries P. A mechanism for cognitive dynamics: neuronal communication through neuronal  
577 coherence. Trends Cogn Sci [Internet]. 2005 Oct [cited 2014 Jul 9];9(10):474–80.  
578 Available from: <http://linkinghub.elsevier.com/retrieve/pii/S1364661305002421>
- 579 4. Gray CM, Singer W. Stimulus-specific neuronal oscillations in orientation columns of cat  
580 visual cortex. Proc Natl Acad Sci U S A. 1989;86(5):1698–702.

- 581 5. Womelsdorf T, Schoffelen J, Oostenveld R, Singer W. Modulation of Neuronal  
582 Interactions Through Neuronal Synchronization. *Science* (80- ). 2007;316(June):1609–12.
- 583 6. Sutton R, Barto AG. Reinforcement learning: an introduction. 28th ed. MIT Press; 1998.  
584 322 p.
- 585 7. Frank MJ, Badre D. Mechanisms of hierarchical reinforcement learning in corticostriatal  
586 circuits 1: Computational analysis. *Cereb Cortex*. 2012;22(3):509–26.
- 587 8. Hochreiter S, Schmidhuber J. Long Short-Term Memory. *Neural Comput* [Internet].  
588 1997;9(8):1735–80. Available from: [http://www7.informatik.tu-](http://www7.informatik.tu-muenchen.de/~hochreit%5Cnhttp://www.idsia.ch/~juergen)  
589 [muenchen.de/~hochreit%5Cnhttp://www.idsia.ch/~juergen](http://www7.informatik.tu-muenchen.de/~hochreit%5Cnhttp://www.idsia.ch/~juergen)
- 590 9. Silvetti M, Seurinck R, Verguts T. Value and Prediction Error in Medial Frontal Cortex:  
591 Integrating the Single-Unit and Systems Levels of Analysis. *Front Hum Neurosci*  
592 [Internet]. 2011;5(August):75. Available from:  
593 <http://journal.frontiersin.org/article/10.3389/fnhum.2011.00075/abstract>
- 594 10. Rumelhart DE, Hinton GE, Williams RJ. Learning representations by back-propagating  
595 errors. *Nature*. 1986;323(October):533–6.
- 596 11. Hinton G. A Practical Guide to Training Restricted Boltzmann Machines. In: Montavon  
597 G, Orr GB, Müller K-R, editors. *Neural Networks: Tricks of the Trade* [Internet]. 2nd ed.  
598 2012. p. 599–619. Available from:  
599 [http://citeseerx.ist.psu.edu/viewdoc/download?doi=10.1.1.170.9573&rep=rep1&am](http://citeseerx.ist.psu.edu/viewdoc/download?doi=10.1.1.170.9573&rep=rep1&rep_type=pdf)  
600 [p;type=pdf](http://citeseerx.ist.psu.edu/viewdoc/download?doi=10.1.1.170.9573&rep=rep1&rep_type=pdf)
- 601 12. Rescorla RA, Wagner AR. A theory of Pavlovian conditioning: Variations in the  
602 effectiveness of reinforcement and nonreinforcement. *Class Cond II Curr Res Theory*  
603 [Internet]. 1972;21(6):64–99. Available from:  
604 <http://homepage.mac.com/sanagnos/rescorlawagner1972.pdf>
- 605 13. Widrow B, Hoff M. Adaptive switching circuits. *IRE WESCON Conv Rec*. 1960;4(1):96–  
606 104.
- 607 14. Houk JC, Adams JL, Barto AG. A model of how the basal ganglia generate and use neural

- 608 signals that predict reinforcement. *Model Inf Process Basal Ganglia*. 1995;13(July  
609 1995):249–70.
- 610 15. Botvinick MM, Braver TS, Barch DM, Carter CS, Cohen JD. Conflict monitoring and  
611 cognitive control. [Internet]. Vol. 108, *Psychological review*. 2001. p. 624–52. Available  
612 from: <http://doi.apa.org/getdoi.cfm?doi=10.1037/0033-295X.108.3.624>
- 613 16. Verguts T. Binding by random bursts: A computational model of cognitive control. *J Cogn*  
614 *Neurosci*. 2017;29(6):1103–18.
- 615 17. Springer M, Paulsson J. Harmonies from noise. *Nature*. 2006;439(January):27–9.
- 616 18. Zhou T, Chen L, Aihara K. Molecular Communication through Stochastic  
617 Synchronization Induced by Extracellular Fluctuations. *Phys Rev Lett*.  
618 2005;178103(October):2–5.
- 619 19. Bellebaum C, Daum I. Learning-related changes in reward expectancy are reflected in the  
620 feedback-related negativity. *Eur J Neurosci*. 2008;27(7):1823–35.
- 621 20. Luu P, Tucker DM, Derryberry D, Reed M, Luu P, Tucker DM, et al. Electrophysiological  
622 Responses to Errors and Feedback in the Process of Action Regulation. *Psychol Sci*.  
623 2003;14(1):47–53.
- 624 21. Hajcak G, Holroyd CB, Moser JS, Simons RF. Brain potentials associated with expected  
625 and unexpected good and bad outcomes. *Psychophysiology*. 2005;42(2):161–70.
- 626 22. Hajcak G, Moser JS, Holroyd CB, Simons RF. The feedback-related negativity reflects  
627 the binary evaluation of good versus bad outcomes. *Biol Psychol*. 2006;71(2):148–54.
- 628 23. Hajcak G, Moser JS, Holroyd CB, Simons RF. It’s worse than you thought: The feedback  
629 negativity and violations of reward prediction in gambling tasks. *Psychophysiology*.  
630 2007;44(6):905–12.
- 631 24. Cohen MX, Elger CE, Ranganath C. Reward expectation modulates feedback-related  
632 negativity and EEG spectra. *Neuroimage* [Internet]. 2007;35(2):968–78. Available from:  
633 <http://dx.doi.org/10.1016/j.neuroimage.2006.11.056>
- 634 25. Cavanagh JF, Frank MJ, Klein TJ, Allen JJB. Frontal theta links prediction errors to

- 635 behavioral adaptation in reinforcement learning. *Neuroimage* [Internet].  
636 2010;49(4):3198–209. Available from:  
637 <http://dx.doi.org/10.1016/j.neuroimage.2009.11.080>
- 638 26. Cavanagh JF, Frank MJ. Frontal theta as a mechanism for cognitive control. *Trends Cogn*  
639 *Sci* [Internet]. 2014;18(8):414–21. Available from:  
640 <http://dx.doi.org/10.1016/j.tics.2014.04.012>
- 641 27. Womelsdorf T, Johnston K, Vinck M, Everling S. Theta-activity in anterior cingulate  
642 cortex predicts task rules and their adjustments following errors. *Proc Natl Acad Sci*  
643 [Internet]. 2010;107(11):5248–53. Available from:  
644 <http://www.pnas.org/cgi/doi/10.1073/pnas.0906194107>
- 645 28. Voloh B, Valiante TA, Everling S, Womelsdorf T. Theta-gamma coordination between  
646 anterior cingulate and prefrontal cortex indexes correct attention shifts. *Proc Natl Acad*  
647 *Sci* [Internet]. 2015;112(27):8457–62. Available from:  
648 <http://www.ncbi.nlm.nih.gov/pubmed/26100868>
- 649 29. Holroyd CB, Coles MGH. The neural basis of human error processing: Reinforcement  
650 learning, dopamine, and the error-related negativity. *Psychol Rev.* 2002;109(4):679–709.
- 651 30. Alexander W, Brown JW. Hierarchical error representation: A computational model of  
652 anterior cingulate and dorsolateral prefrontal cortex. *Neural Comput* [Internet].  
653 2015;27:2354–410. Available from: <http://arxiv.org/abs/1803.01446>
- 654 31. Holroyd CB, McClure SM. Hierarchical control over effortful behavior by rodent medial  
655 frontal cortex: A computational model. *Psychol Rev.* 2015;122(1):54–83.
- 656 32. Verguts T, Vassena E, Silvetti M. Adaptive effort investment in cognitive and physical  
657 tasks : a neurocomputational model. *Front Behav Neurosci.* 2015;9(March):1–17.
- 658 33. Silvetti M, Vassena E, Abrahamse E, Verguts T. Dorsal anterior cingulate-brainstem  
659 ensemble as a reinforcement meta-learner. *PLoS Comput Biol.* 2018;14(8):1–32.
- 660 34. Wang JX, Kurth-nelson Z, Kumaran D, Tirumala D, Soyer H, Leibo JZ, et al. Prefrontal  
661 cortex as a meta-reinforcement learning system. *Nat Neurosci* [Internet]. 2018;21(June).

- 662 Available from: <http://dx.doi.org/10.1038/s41593-018-0147-8>
- 663 35. Silvetti M, Alexander W, Verguts T, Brown JW. From conflict management to reward-  
664 based decision making: Actors and critics in primate medial frontal cortex. *Neurosci*  
665 *Biobehav Rev* [Internet]. 2014;46(P1):44–57. Available from:  
666 <http://dx.doi.org/10.1016/j.neubiorev.2013.11.003>
- 667 36. Braver TS, Cohen JD, Nystrom LE, Jonides J, Smith EE, Noll DC. A parametric study of  
668 prefrontal cortex involvement in human working memory. *Neuroimage*. 1997;5(1):49–62.
- 669 37. Mac Donald AW, Cohen JD, Stenger A V., Carter CS. Dissociating the Role of the  
670 Dorsolateral Prefrontal and Anterior Cingulate Cortex in Cognitive Control. *Science* (80-  
671 ). 2000;288(June):1835–8.
- 672 38. Aston-Jones G, Cohen JD. An Integrative Theory of Locus Coeruleus-Norepinephrine  
673 function: Adaptive Gain and Optimal Performance. *Annu Rev Neurosci* [Internet].  
674 2005;28(1):403–50. Available from:  
675 <http://www.annualreviews.org/doi/abs/10.1146/annurev.neuro.28.061604.135709>
- 676 39. Holroyd CB. The waste disposal problem of effortful control. In: Braver TS, editor.  
677 *Motivation and cognitive control*. Hove, UK: Psychology Press; 2016. p. 235–260.
- 678 40. Miller EK, Cohen JD. An Integrative Theory of Prefrontal Cortex Function. *Annu Rev*  
679 *Neurosci*. 2001;24:167–202.
- 680 41. Kondo H, Osaka N, Osaka M. Cooperation of the anterior cingulate cortex and dorsolateral  
681 prefrontal cortex for attention shifting. *Neuroimage*. 2004;23(2):670–9.
- 682 42. Rodriguez E, George N, Lachaux J-P, Martinerie J, Renault B, Varela FJ. Perception ' s  
683 shadow : long- distance synchronization of human brain activity. *Nature*.  
684 1999;397(February):430–3.
- 685 43. Hammond C, Bergman H, Brown P. Pathological synchronization in Parkinson's disease:  
686 networks, models and treatments. *Trends Neurosci*. 2007;30(7):357–64.
- 687 44. Canolty RT, Edwards E, Dalal SS, Soltani M, Nagarajan SS, Berger MS, et al. High  
688 Gamma Power is Phase-Locked to Theta Oscillations in Human Neocortex. *Science*.

- 689 2009;313(5793):1626–8.
- 690 45. Jensen O, Colgin LL. Cross-frequency coupling between neuronal oscillations. Trends  
691 Cogn Sci. 2007;11(7):267–9.
- 692 46. Lisman JE, Jensen O. The Theta-Gamma Neural Code. Neuron [Internet].  
693 2013;77(6):1002–16. Available from: <http://dx.doi.org/10.1016/j.neuron.2013.03.007>
- 694 47. Franklin NT, Frank MJ. Compositional clustering in task structure learning. PLoS Comput  
695 Biol. 2018;14(4):1–25.
- 696 48. Collins A, Frank MJ. Within and across-trial dynamics of human EEG reveal cooperative  
697 interplay between reinforcement learning and working memory. Proc Natl Acad Sci  
698 [Internet]. 2017;184812. Available from:  
699 <https://www.biorxiv.org/content/early/2017/09/05/184812.full.pdf+html>
- 700 49. Collins AGE, Cavanagh JF, Frank MJ. Human EEG Uncovers Latent Generalizable Rule  
701 Structure during Learning. J Neurosci [Internet]. 2014;34(13):4677–85. Available from:  
702 <http://www.jneurosci.org/cgi/doi/10.1523/JNEUROSCI.3900-13.2014>
- 703 50. Masse NY, Grant GD, Freedman DJ. Alleviating catastrophic forgetting using context-  
704 dependent gating and synaptic stabilization. arXiv:180201569 [Internet]. 2018;1–12.  
705 Available from: <http://arxiv.org/abs/1802.01569>
- 706 51. Bastos AM, Vezoli J, Fries P. Communication through coherence with inter-areal delays.  
707 Curr Opin Neurobiol [Internet]. 2014;31(31):173–80. Available from:  
708 <http://dx.doi.org/10.1016/j.conb.2014.11.001>
- 709 52. Righetti L, Buchli J, Ijspeert AJ. Dynamic Hebbian learning in adaptive frequency  
710 oscillators. Phys D Nonlinear Phenom. 2006;216(2):269–81.
- 711 53. Cohen JD, Dunbar K, McClelland JL. On the control of automatic processes: a parallel  
712 distributed processing account of the Stroop effect. Psychol Rev [Internet].  
713 1990;97(3):332–61. Available from: <http://www.ncbi.nlm.nih.gov/pubmed/2200075>
- 714 54. Reilly RCO, Frank MJ. Making Working Memory Work : A Computational Model of  
715 Learning in the Prefrontal Cortex and Basal Ganglia. Neural Comput. 2006;18:283–328.



- 716 55. Frank MJ. Hold your horses : A dynamic computational role for the subthalamic nucleus  
717 in decision making. *Neural Networks*. 2006;19:1120–36.
- 718 56. Shenhav A, Botvinick MM, Cohen JD. The expected value of control: An integrative  
719 theory of anterior cingulate cortex function. *Neuron* [Internet]. 2013;79(2):217–40.  
720 Available from: <http://dx.doi.org/10.1016/j.neuron.2013.07.007>
- 721 57. Norman KA. How hippocampus and cortex contribute to recognition memory: Revisiting  
722 the complementary learning systems model. *Hippocampus*. 2010;20(11):1217–27.
- 723 58. McClelland JL, McNaughton BL, O'Reilly RC. Why There Are Complementary Learning  
724 Systems in the Hippocampus and Neo-cortex: Insights from the Successes and Failures of  
725 Connectionists Models of Learning and Memory. *Psychol Rev*. 1995;102(3):419–57.
- 726 59. O'Reilly RC, Norman KA. Hippocampal and neocortical contributions to memory:  
727 Advances in the complementary learning systems framework. *Trends Cogn Sci*.  
728 2002;6(12):505–10.
- 729 60. Robins A, McCallum S. Catastrophic Forgetting and the Pseudorehearsal Solution in  
730 Hopfield-type Networks. *Conn Sci* [Internet]. 1998;10(2):121–35. Available from:  
731 <https://doi.org/10.1080/095400998116530>
- 732 61. Meeter M, Murre JMJ, Talamini LM. Mode shifting between storage and recall based on  
733 novelty detection in oscillating hippocampal circuits. *Hippocampus*. 2004;14(6):722–41.
- 734 62. Lindsay S, Gaskell MG. A complementary systems account of word learning in L1 and  
735 L2. *Lang Learn*. 2010;60(SUPPL. 2):45–63.
- 736 63. Mayberry EJ, Sage K, Ehsan S, Lambon Ralph MA. Relearning in semantic dementia  
737 reflects contributions from both medial temporal lobe episodic and degraded neocortical  
738 semantic systems: Evidence in support of the complementary learning systems theory.  
739 *Neuropsychologia* [Internet]. 2011;49(13):3591–8. Available from:  
740 <http://dx.doi.org/10.1016/j.neuropsychologia.2011.09.010>
- 741 64. Fusi S, Drew PJ, Abbott LF. Cascade models of synaptically stored memories. *Neuron*.  
742 2005;45(4):599–611.

- 743 65. Kirkpatrick J, Pascanu R, Rabinowitz N, Veness J, Desjardins G, Rusu AA, et al.  
744 Overcoming Catastrophic Forgetting in Neural Networks. Proc Natl Acad Sci [Internet].  
745 2017;114(13):3521–6. Available from: <http://arxiv.org/abs/1708.02072>
- 746 66. Zenke F, Poole B, Ganguli S. Continual Learning Through Synaptic Intelligence. 2017;  
747 Available from: <http://arxiv.org/abs/1703.04200>
- 748 67. Kortge C. Episodic memory in connectionist networks. In: 12th Annual meeting of the  
749 Cognitive Science Society. 1990. p. 764–71.
- 750 68. French RM. Semi-distributed Representations and Catastrophic Forgetting in  
751 Connectionist Networks. Conn Sci [Internet]. 1992;4(3–4):365–77. Available from:  
752 <https://doi.org/10.1080/09540099208946624>
- 753 69. Hebb DO. The Organization of Behavior. A neuropsychological theory. Organ Behav.  
754 1949;911(1):335.
- 755 70. Li Z, Hopfield JJ. Modeling the olfactory bulb and its neural oscillatory processings. Biol  
756 Cybern. 1989;61:379–92.
- 757 71. Izquierdo A, Jentsch JD. Reversal learning as a measure of impulsive and compulsive  
758 behavior in addictions. Psychopharmacology (Berl). 2012;219(2):607–20.
- 759 72. Clark L, Cools R, Robbins TW. The neuropsychology of ventral prefrontal cortex:  
760 Decision-making and reversal learning. Brain Cogn. 2004;55(1):41–53.
- 761 73. van Driel J, Cox R, Cohen MX. Phase-clustering bias in phase-amplitude cross-frequency  
762 coupling and its removal. J Neurosci Methods [Internet]. 2015;254:60–72. Available  
763 from: <http://dx.doi.org/10.1016/j.jneumeth.2015.07.014>  
764
